# Supplementary material for: Tendon lengthening and fascia release for healing and preventing diabetic foot ulcers: a systematic review and meta-analysis
Source: J Foot Ankle Res. 2015 Jul 30;8:33. doi: 10.1186/s13047-015-0085-6 (PMC4546251; doi:10.1186/s13047-015-0085-6)
Supplement: Additional file 3: — Quality assessment scores for individual checklist items. A table showing the quality assessment scores for the individual checklist items for each included study. (PDF 44 kb) [file 13047_2015_85_MOESM3_ESM.pdf]

### Additional file 3

### Quality assessment scores for individual checklist items

[illegible]
