# Supplementary material for: Tendon lengthening and fascia release for healing and preventing diabetic foot ulcers: a systematic review and meta‐analysis
Source: Springer Nature journal article supplement (doi:10.1186/s13047-015-0085-6), 2015-01-01
Supplement: MOESM2 [file 7114644]

## Additional file 2

### Data extraction table

| Study                             | Design                      | Number of participants (N), number of ulcers                              | Age (years)*, male %, duration of diabetes (years)†, duration of ulcer (months)‡                                                              | Location of ulcer | Details of intervention and control groups                                                                                         | Outcome results§                                                                                                                                                                                                                                                                                                                                                                                            | Complications and adverse events                                                                                                                                                                                | Follow-up (months)¶ | Comments                                                   |
|-----------------------------------|-----------------------------|---------------------------------------------------------------------------|-----------------------------------------------------------------------------------------------------------------------------------------------|-------------------|------------------------------------------------------------------------------------------------------------------------------------|-------------------------------------------------------------------------------------------------------------------------------------------------------------------------------------------------------------------------------------------------------------------------------------------------------------------------------------------------------------------------------------------------------------|-----------------------------------------------------------------------------------------------------------------------------------------------------------------------------------------------------------------|---------------------|------------------------------------------------------------|
| Allam, 2006 [21]                  | Randomised-controlled trial | <i>Intervention group</i><br>N = 15<br><br><i>Control group</i><br>N = 14 | <i>Age</i><br>55.0 ± 11.0<br><br><i>Duration of diabetes</i><br>20.0 ± 11.0<br><br><i>Duration of ulcer</i><br>Median = 42.0<br>(range 10-72) | Forefoot          | <i>Intervention group</i><br>GR (Tongue in groove) or<br>ATL (Percutaneous triple hemi-section)<br><br><i>Control group</i><br>TCC | <i>Intervention group</i><br>1) Time to healing of ulcer<br>Median 30 days<br>(range 21-221 days)<br><br>2) Rate of ulcers healed<br>15/15 (100%)<br><br>3) Rate of ulcer recurrence<br>3/15 (20.0%)<br><br><i>Control group</i><br>1) Time to healing of ulcer<br>Median 49 days<br>(range 32-230 days)<br><br>2) Rate of ulcers healed<br>14/14 (100%)<br><br>3) Rate of ulcer recurrence<br>8/14 (57.1%) | <i>Intervention group</i><br>3 wound haematomas (20.0%)<br>2 ruptured Achilles tendons (13.3%)<br>2 calcaneal gait (13.3%)<br>3 late heel ulcers (20.0%)<br><br><i>Control group</i><br>1 calcaneal gait (7.1%) | Mean = 24.0         | Data for time to healing of ulcer is for 6 month follow-up |
| Batista <i>et al.</i> , 2011 [26] | Prospective case series     | N = 52                                                                    | <i>Age</i><br>Mean = 66.4<br><br><i>Duration of diabetes</i><br>> 5 years (100% participants)                                                 | Forefoot          | ATL (Modified White with three hemi-sections) + TCC                                                                                | 1) Rate of ulcer recurrence<br>4/52 (7.7%)                                                                                                                                                                                                                                                                                                                                                                  | None reported                                                                                                                                                                                                   | Mean = 24.0         |                                                            |

|                                    |                           |                                                                                                                    |                                                                                       |                      |                                                                                                                                                                                                                                                 |                                                                                                                                                                                                                                                                                                                                |                                                                                                                                                                                                                                                                                                                                                |             |                                                                                                                                                                              |
|------------------------------------|---------------------------|--------------------------------------------------------------------------------------------------------------------|---------------------------------------------------------------------------------------|----------------------|-------------------------------------------------------------------------------------------------------------------------------------------------------------------------------------------------------------------------------------------------|--------------------------------------------------------------------------------------------------------------------------------------------------------------------------------------------------------------------------------------------------------------------------------------------------------------------------------|------------------------------------------------------------------------------------------------------------------------------------------------------------------------------------------------------------------------------------------------------------------------------------------------------------------------------------------------|-------------|------------------------------------------------------------------------------------------------------------------------------------------------------------------------------|
| Colen <i>et al.</i> , 2013 [27]    | Retrospective cohort      | <p><i>Intervention group</i><br/>N = 138<br/>145 ulcers</p> <p><i>Control group</i><br/>N = 149<br/>179 ulcers</p> | <p>Age<br/>58.5 ± 10.0</p> <p>Male % = 59</p>                                         | Forefoot/<br>Midfoot | <p><i>Intervention group</i><br/>ATL (2-stab method or open Z-plasty)<br/>+ surgical soft tissue reconstruction<br/>± tarsal tunnel release</p> <p><i>Control group</i><br/>Surgical soft tissue reconstruction<br/>± tarsal tunnel release</p> | <p><i>Intervention group</i></p> <p>1) Rate of ulcer recurrence (requiring reoperation)<br/>3/145 (2.1%)</p> <p>2) Rate of transfer ulcers<br/>6/138 (4.3%)</p> <p><i>Control group</i></p> <p>1) Rate of ulcer recurrence (requiring reoperation)<br/>45/179 (25.1%)</p> <p>2) Rate of transfer ulcers<br/>21/149 (14.1%)</p> | <p><i>Intervention group</i><br/>10 suture line dehiscence (7.2%)<br/>17 small plantar wounds delaying weight-bearing ambulation &gt;28 days (12.3%)<br/>2 heel transfer ulcers (1.4%)</p> <p><i>Control group</i><br/>13 suture line dehiscence (9.4%)<br/>18 small plantar wounds delaying weight-bearing ambulation &gt;28 days (12.1%)</p> | 35.3 ± 11.0 | Surgical soft tissue reconstruction refers to wound closure surgery including management of bony prominences and debridement                                                 |
| Dayer & Assal, 2009 [28]           | Prospective cohort        | N = 24                                                                                                             | <p>Age<br/>56.3 ± 12.4</p> <p>Male % = 42</p> <p>Duration of ulcer<br/>15.9 ± 7.6</p> | Forefoot             | GR (Strayer)<br>+ Jones extensor hallucis longus transfer and flexor hallucis longus transfer<br>± peroneus longus to peroneus brevis transfer                                                                                                  | <p>1) Time to healing of ulcer<br/>31.3 ± 12.2 days</p> <p>2) Rate of ulcers healed<br/>21/22 (95.5%)</p> <p>3) Rate of ulcer recurrence<br/>0/21 (0%)</p> <p>4) Rate of transfer ulcers<br/>1/22 (4.5%)</p>                                                                                                                   | 1 death from myocardial infarction (4.2%)                                                                                                                                                                                                                                                                                                      | 39.2 ± 12.2 | Data only presented for subjects who received GR                                                                                                                             |
| Hamilton <i>et al.</i> , 2005 [29] | Retrospective case series | N = 7                                                                                                              | Age<br>51.3 ± 10.9                                                                    | Forefoot             | GR<br>+ peroneus longus to brevis transfer<br>+ resection of the 2 <sup>nd</sup> through 5 <sup>th</sup> metatarsal heads<br>+ TCC                                                                                                              | <p>1) Time to healing of ulcer<br/>42.6 days (range 28-102 days)</p> <p>2) Rate of ulcers healed<br/>7/7 (100%)</p> <p>3) Rate of ulcer recurrence<br/>0/7 (0%)</p> <p>4) Rate of transfer ulcers<br/>0/7 (0%)</p>                                                                                                             | <p>1 dehiscence at site of gastrocnemius incision (14.3%)<br/>1 sinus from antibiotic bead placed in forefoot to treat osteomyelitis (14.3%)</p>                                                                                                                                                                                               | 17.1 ± 7.3  | <p>Data only presented for subjects with diabetes</p> <p>Data for time to healing of ulcer includes non-diabetic subjects (data for this outcome not separated in study)</p> |

|                                       |                           |                     |                                                                                                                                          |                      |                                                                                                                                                                                                                                           |                                                                                                                                                                                                                     |                                                                                                                                                                               |             |                                                                |
|---------------------------------------|---------------------------|---------------------|------------------------------------------------------------------------------------------------------------------------------------------|----------------------|-------------------------------------------------------------------------------------------------------------------------------------------------------------------------------------------------------------------------------------------|---------------------------------------------------------------------------------------------------------------------------------------------------------------------------------------------------------------------|-------------------------------------------------------------------------------------------------------------------------------------------------------------------------------|-------------|----------------------------------------------------------------|
| Kim <i>et al.</i> , 2012 [22]         | Prospective case series   | N = 60<br>64 ulcers | Age<br>54.1 ± 14.3<br><br>Male % = 62<br><br>Duration of diabetes<br>> 10 years (70% participants)<br><br>Duration of ulcer<br>5.5 ± 3.6 | Forefoot             | Selective plantar fascia release                                                                                                                                                                                                          | 1) Rate of ulcers healed<br>36/64 (56.3%)<br><br>2) Rate of ulcer recurrence<br>0/36 (0%)                                                                                                                           | None reported                                                                                                                                                                 | Mean = 23.5 |                                                                |
| Laborde, 2005 [30]                    | Prospective case series   | N = 17<br>20 ulcers | Age<br>58.7 ± 12.3<br><br>Male % = 53<br><br>Duration of ulcer<br>12.9 ± 19.3                                                            | Forefoot             | GR (Vulpius)<br>+ toe tenotomy for ulcers on the 1 <sup>st</sup> toe<br>+ peroneus longus lengthening (z-type) for 1st metatarsal ulcers<br>+ posterior tibial lengthening (intramuscular) for 5 <sup>th</sup> metatarsal & cuboid ulcers | 1) Rate of ulcers healed<br>19/20 (95.0%)<br><br>2) Rate of ulcer recurrence<br>3/19 (15.8%)<br><br>3) Rate of transfer ulcers<br>2/17 (11.8%)                                                                      | 1 death (5.9%)<br>1 pulmonary embolism (5.9%)<br>1 gangrene with below knee amputation (5.9%)<br>1 gangrene with above knee amputation (5.9%)<br>1 heel transfer ulcer (5.9%) | 34.6 ± 19.3 | Data only presented for subjects with diabetes who received GR |
| Laborde, 2009 [31]                    | Retrospective case series | N = 10<br>10 ulcers | Age<br>60.1 ± 15.1<br><br>Male % = 60<br><br>Duration of ulcer<br>16.2 ± 21.7                                                            | Midfoot              | GR (Vulpius)                                                                                                                                                                                                                              | 1) Rate of ulcers healed<br>8/9 (88.9%)<br><br>2) Rate of ulcer recurrence<br>1/8 (12.5%)<br><br>3) Rate of transfer ulcers<br>0/9 (0%)                                                                             | 2 deaths (20.0%)<br>1 gangrene with trans-femoral amputation (10.0%)                                                                                                          | 35.2 ± 18.5 | Data only presented for subjects with diabetes                 |
| La Fontaine <i>et al.</i> , 2008 [32] | Retrospective case series | N = 28              | Age<br>Median = 51.0 (range 24-72)<br><br>Male % = 71                                                                                    | Forefoot/<br>Midfoot | ATL (Hoke)                                                                                                                                                                                                                                | 1) Time to healing of ulcer<br>65.8 days (range 21-504 days)<br><br>2) Rate of ulcers healed<br>24/28 (85.7%)<br><br>3) Rate of ulcer recurrence<br>10/24 (41.7%)<br><br>4) Rate of transfer ulcers<br>6/28 (21.4%) | 5 heel transfer ulcers (17.9%)                                                                                                                                                | Mean = 28.8 |                                                                |

|                               |                      |                                                                           |                                                                                                                                                                                                                                                                                                                                                    |          |                                                                                  |                                                                                                                                                                                                                                                                                                                                                                                               |                                                                                                                                                                                                 |                                                                                                                      |                                                                                                                         |
|-------------------------------|----------------------|---------------------------------------------------------------------------|----------------------------------------------------------------------------------------------------------------------------------------------------------------------------------------------------------------------------------------------------------------------------------------------------------------------------------------------------|----------|----------------------------------------------------------------------------------|-----------------------------------------------------------------------------------------------------------------------------------------------------------------------------------------------------------------------------------------------------------------------------------------------------------------------------------------------------------------------------------------------|-------------------------------------------------------------------------------------------------------------------------------------------------------------------------------------------------|----------------------------------------------------------------------------------------------------------------------|-------------------------------------------------------------------------------------------------------------------------|
| Lin <i>et al.</i> , 1996 [33] | Retrospective cohort | <i>Intervention group</i><br>N = 15<br><br><i>Control group</i><br>N = 21 | <i>Intervention group</i><br>Age<br>45.8 ± 16.3<br><br><i>Male %</i> = 73<br><br><i>Duration of diabetes</i><br>10.0 ± 4.4<br><br><i>Duration of ulcer</i><br>11.5 ± 3.7<br><br><i>Control group</i><br>Age<br>50.7 ± 11.8<br><br><i>Male %</i> = 48<br><br><i>Duration of diabetes</i><br>11.7 ± 5.3<br><br><i>Duration of ulcer</i><br>6.5 ± 3.1 | Forefoot | <i>Intervention group</i><br>ATL (Hoke) + TCC<br><br><i>Control group</i><br>TCC | <i>Intervention group</i><br>1) Time to healing of ulcer<br>39.3 days<br>(range 21-90 days)<br><br>2) Rate of ulcers healed<br>14/15 (93.3%)<br><br>3) Rate of ulcer recurrence<br>0/14 (0%)<br><br><i>Control group</i><br>1) Time to healing of ulcer<br>43.5 days<br>(range 25-62 days)<br><br>2) Rate of ulcers healed<br>21/21 (100%)<br><br>3) Rate of ulcer recurrence<br>4/21 (19.0%) | <i>Intervention group</i><br>1 infection at the 1 <sup>st</sup> metatarsal head (12 weeks after ATL procedure) with partial foot amputation (6.7%)<br><br><i>Control group</i><br>None reported | <i>Intervention group</i><br>Mean = 17.3<br>(range 11-26)<br><br><i>Control group</i><br>Mean = 12.8<br>(range 8-23) | Time to healing for intervention group was calculated 3 weeks post ATL (from the time of reinitiating the TCC protocol) |
|-------------------------------|----------------------|---------------------------------------------------------------------------|----------------------------------------------------------------------------------------------------------------------------------------------------------------------------------------------------------------------------------------------------------------------------------------------------------------------------------------------------|----------|----------------------------------------------------------------------------------|-----------------------------------------------------------------------------------------------------------------------------------------------------------------------------------------------------------------------------------------------------------------------------------------------------------------------------------------------------------------------------------------------|-------------------------------------------------------------------------------------------------------------------------------------------------------------------------------------------------|----------------------------------------------------------------------------------------------------------------------|-------------------------------------------------------------------------------------------------------------------------|

|                                   |                             |                                                                           |                                                                                  |          |                                                                                  |                                                                                                                                                                                                                                                                                                                                                                      |                                                                                                                                                                                                                                                                                                                                                                                                                                                             |                              |                                                                   |
|-----------------------------------|-----------------------------|---------------------------------------------------------------------------|----------------------------------------------------------------------------------|----------|----------------------------------------------------------------------------------|----------------------------------------------------------------------------------------------------------------------------------------------------------------------------------------------------------------------------------------------------------------------------------------------------------------------------------------------------------------------|-------------------------------------------------------------------------------------------------------------------------------------------------------------------------------------------------------------------------------------------------------------------------------------------------------------------------------------------------------------------------------------------------------------------------------------------------------------|------------------------------|-------------------------------------------------------------------|
| Mueller <i>et al.</i> , 2003 [15] | Randomised-controlled trial | <i>Intervention group</i><br>N = 31<br><br><i>Control group</i><br>N = 33 | Age<br>56.0 ± 10.0<br><br>Male % = 77<br><br>Duration of diabetes<br>18.4 ± 11.7 | Forefoot | <i>Intervention group</i><br>ATL (Hoke) + TCC<br><br><i>Control group</i><br>TCC | <i>Intervention group</i><br>1) Time to healing of ulcer<br>57.5 ± 47.0 days<br><br>2) Rate of ulcers healed<br>30/30 (100%)<br><br>3) Rate of ulcer recurrence<br>10/26 (38.5%)<br><br><i>Control group</i><br>1) Time to healing of ulcer<br>40.8 ± 28.1 days<br><br>2) Rate of ulcers healed<br>29/33 (87.9%)<br><br>3) Rate of ulcer recurrence<br>21/26 (80.8%) | <i>Intervention group</i><br>3 deaths (1 from MI during treatment phase) (9.7%)<br>4 heel transfer ulcers (12.9%)<br>4 abrasions from the TCC (12.9%)<br>1 deep infection requiring debridement and antibiotic therapy (3.2%)<br>2 falls in the TCC (6.5%)<br><br><i>Control group</i><br>3 deaths (9.1%)<br>1 toe amputation (3.0%)<br>6 abrasions from the TCC (18.2%)<br>3 intolerant to cast and immobilized with removable pressure relief boot (9.1%) | 25.2 ± 8.4 (range 15.6-46.8) | Average follow-up time was measured from initial healing of ulcer |
|-----------------------------------|-----------------------------|---------------------------------------------------------------------------|----------------------------------------------------------------------------------|----------|----------------------------------------------------------------------------------|----------------------------------------------------------------------------------------------------------------------------------------------------------------------------------------------------------------------------------------------------------------------------------------------------------------------------------------------------------------------|-------------------------------------------------------------------------------------------------------------------------------------------------------------------------------------------------------------------------------------------------------------------------------------------------------------------------------------------------------------------------------------------------------------------------------------------------------------|------------------------------|-------------------------------------------------------------------|

\* Unless shown otherwise, age given as mean ± standard deviation

† Unless shown otherwise, duration of diabetes given as mean ± standard deviation

‡ Unless shown otherwise, duration of ulcer given as mean ± standard deviation

§Subjects available for follow-up

¶Unless shown otherwise, follow-up given as mean± standard deviation

Abbreviations: GR, gastrocnemius recession; ATL, Achilles tendon lengthening; TCC, total contact cast.
